# Supplementary material for: A pilot study demonstrating the altered gut microbiota functionality in stable adults with Cystic Fibrosis
Source: PubMed Central journal article supplement (PMC5532234; doi:10.1038/s41598-017-06880-y), 2017-07-27
Supplement: 41598_2017_6880_MOESM1_ESM.pdf [file 41598_2017_6880_MOESM1_ESM.pdf]

## **A pilot study demonstrating the altered gut microbiota functionality in stable adults with Cystic Fibrosis**

F. Fouhy<sup>1</sup>, N.J Ronan<sup>2,3</sup>, O. O'Sullivan<sup>1,4</sup>, Y. McCarthy<sup>3</sup>, A. M. Walsh<sup>1,4</sup>, D.M. Murphy<sup>2,3</sup>, M. Daly<sup>3</sup>, E.T. Flanagan<sup>2,3</sup>, C. Fleming<sup>3</sup>, M. Mc Carthy<sup>3</sup>, C. Shortt<sup>3</sup>, J. A. Eustace<sup>2</sup>, F. Shanahan<sup>4,5</sup>, M.C. Rea<sup>1,4</sup>, R. P. Ross<sup>1,4,6</sup>, C. Stanton<sup>1,4</sup>, B.J. Plant<sup>2,3,4,5\*</sup>

<sup>1</sup> Teagasc Food Research Centre, Moorepark, Fermoy, Co. Cork, Ireland

<sup>2</sup> HRB Clinical Research Facility, University College Cork, Cork, Ireland

<sup>3</sup> Cork Cystic Fibrosis Centre, University College Cork, Cork University Hospital, Wilton, Cork, Ireland

<sup>4</sup> APC Microbiome Institute, Cork, Ireland

<sup>5</sup> Department of Medicine, University College Cork, National University of Ireland, Cork, Ireland

<sup>6</sup> School of Microbiology, University College Cork, Cork, Ireland

| Sample ID | Age at sample collection | BMI | % predicted FEV1 | Genotype     | Pancreatic insufficient | Gender |
|-----------|--------------------------|-----|------------------|--------------|-------------------------|--------|
| CF1       | 30                       | 18  | 45.79%           | dF508/R1066H | Yes                     | F      |
| CF2       | 30                       | 21  | 56.91%           | dF508/dF508  | Yes                     | M      |
| CF3       | 23                       | 20  | 72.43%           | dF508/G551D  | Yes                     | M      |
| CF4       | 71                       | 24  | 54.96%           | dF508/R117L  | No                      | F      |
| CF5       | 33                       | 24  | 80.02%           | dF508/dF508  | No                      | M      |
| CF6       | 29                       | 23  | 51.93%           | dF508/dF508  | Yes                     | F      |

**Supplementary Table S1:** Clinical characteristics of the CF group. Gender: F-female; M-male.

| CF ID | Oral antibiotics (previous 12 months)                                                                                              | Number of oral antibiotic (previous 12m) | Number of days between last oral antibiotic and sample collection | IV Antibiotics (previous 12m)                                                                                                     | Number of IV antibiotics (previous 12m) | Number of days between last IV antibiotic and sample collection | Long term oral antibiotics   | Nebulised Antibiotics                                                    | NOTES                                                                |
|-------|------------------------------------------------------------------------------------------------------------------------------------|------------------------------------------|-------------------------------------------------------------------|-----------------------------------------------------------------------------------------------------------------------------------|-----------------------------------------|-----------------------------------------------------------------|------------------------------|--------------------------------------------------------------------------|----------------------------------------------------------------------|
| CF 1  | Ciprofloxacin + Co-amoxiclav 22/1/14 x 2 weeks<br>Co-amoxiclav + ciprofloxacin 19/3/14 x 2 weeks                                   | 2                                        | 281                                                               | Meropenem + Tobramycin 22/4/14 x 2 weeks<br>Meropenem + Tobramycin 17/6/14 x 2 weeks<br>Meropenem + Tobramycin 27/11/14 x 2 weeks | 3                                       | 28                                                              | Azithromycin x long-standing | Colomycin (neb) alternate months<br>Aztreonam alternate months           |                                                                      |
| CF 2  | Ciprofloxacin + Doxycycline 24/4/14 x 2 weeks<br>Ciprofloxacin 14/7/14 x 2 weeks<br>Ciprofloxacin + Doxycycline 22/10/14 x 2 weeks | 3                                        | 64                                                                | Ceftazidime + Tobramycin 24/11/14 x 2 weeks                                                                                       | 1                                       | 31                                                              | Azithromycin x long-standing | Tobramycin (neb) alternate months<br>Aztreonam alternate months          |                                                                      |
| CF 3  | nil                                                                                                                                | 0                                        | N/A                                                               | Ceftazidime + Tobramycin 17/7/14 x 2 weeks                                                                                        | 1                                       | 168                                                             | Azithromycin x long-standing | Tobramycin (Tobipodhaler) alternate months<br>Colomycin alternate months |                                                                      |
| CF 4  | Linezolid + Ciprofloxacin 8/1/14 x 2 weeks<br>Ciprofloxacin + Doxycycline 6/5/14 x 2 weeks                                         | 2                                        | 240                                                               | Ceftazidime 8/1/14 x 2 weeks                                                                                                      | 1                                       | 358                                                             | nil                          | Aztreonam neb alternate months                                           | Immuno-suppression with:<br>Methotrexate, sulphasalaine, entanercept |

|         |                                                                                                                                                                                                                                                  |   |    |                                                                                                                                                                                                                                                                 |   |     |                                     |                                                                                          |  |
|---------|--------------------------------------------------------------------------------------------------------------------------------------------------------------------------------------------------------------------------------------------------|---|----|-----------------------------------------------------------------------------------------------------------------------------------------------------------------------------------------------------------------------------------------------------------------|---|-----|-------------------------------------|------------------------------------------------------------------------------------------|--|
| CF<br>5 | Ciprofloxacin +<br>Doxycycline 24/4/14 x<br>2 weeks<br>Co-amoxiclav<br>12/5/14 x 2 weeks<br>Ciprofloxacin 8/9/14<br>x 2 weeks<br>Ciprofloxacin +<br>Doxycycline Nov<br>2014 x 2 weeks<br>Ciprofloxacin + Co-<br>trimoxazole 8/12/14<br>x 2 weeks | 5 | 24 | Meropenem +<br>Tobramycin 1/7/14<br>x 2 weeks                                                                                                                                                                                                                   | 1 | 184 | Azithromycin<br>x long-<br>standing | Tobramycin<br>(Tobipodhal<br>er) alternate<br>months<br>Aztreonam<br>alternate<br>months |  |
| CF<br>6 | Ciprofloxacin +<br>Doxycycline 14/4/14<br>x 2 weeks<br>Ciprofloxacin + Co-<br>Amoxiclav 17/12/14<br>x 2 weeks                                                                                                                                    | 2 | 15 | Ceftazidime +<br>Tobramycin 3/3/14<br>x 2 weeks<br>Meropenem +<br>Tobramycin 6/5/14<br>x 2 weeks<br>Meropenem +<br>Tobramycin<br>23/6/14 x 2 weeks<br>Ceftazidime +<br>Tobramycin<br>29/9/14 until<br>9/10/14<br>Meropenem +<br>Tobramycin<br>9/10/14 x 2 weeks | 5 | 84  | Azithromycin<br>x long-<br>standing | Tobramycin<br>(Tobipodhal<br>er) alternate<br>months<br>Aztreonam<br>alternate<br>months |  |

**Supplementary Table S2:** Antibiotic and immunosuppressant medication in the previous 12 months prior to sample collection for the CF cohort



| GO functional assignment                                               | Median value for CF group | Median value for control group | p value |
|------------------------------------------------------------------------|---------------------------|--------------------------------|---------|
| <b>Amino acid metabolism</b>                                           |                           |                                |         |
| GO:0019441 BP 05 tryptophan catabolic process to kynurenine            | 333 [250;378]             | 91.4 [75.9;95.4]               | 0.004   |
| GO:0018401 BP 05 peptidyl-proline hydroxylation to 4-hydroxy-L-proline | 0.12 [0.08;0.16]          | 0.45 [0.30;0.69]               | 0.006   |
| GO:0070189 BP 04 kynurenine metabolic process                          | 346 [335;431]             | 149 [137;162]                  | 0.006   |
| GO:0006562 BP 05 proline catabolic process                             | 222 [173;275]             | 63.8 [16.4;108]                | 0.016   |
| GO:0006528 BP 05 asparagine metabolic process                          | 4423 [3574;4963]          | 2691 [2590;3298]               | 0.025   |
| GO:0006529 BP 06 asparagine biosynthetic process                       | 4024 [3175;4526]          | 2468 [2336;3100]               | 0.025   |
| GO:0006530 BP 06 asparagine catabolic process                          | 22.3 [17.3;24.1]          | 9.61 [5.38;13.2]               | 0.025   |
| GO:0010133 BP 06 proline catabolic process to glutamate                | 199 [155;232]             | 51.5 [16.0;101]                | 0.025   |
| GO:0019471 BP 04 4-hydroxyproline metabolic process                    | 12.5 [10.6;15.4]          | 5.76 [3.98;8.14]               | 0.025   |
| GO:0033345 BP 07 asparagine catabolic process via L-aspartate          | 10.0 [7.24;12.9]          | 2.50 [1.20;3.45]               | 0.025   |
| GO:0000162 BP 06 tryptophan biosynthetic process                       | 8024 [7442;9241]          | 6116 [5521;6362]               | 0.037   |
| GO:0006568 BP 05 tryptophan metabolic process                          | 8623 [7750;9874]          | 6472 [5721;6695]               | 0.037   |
| GO:0010121 BP 06 arginine catabolic process to proline via ornithine   | 10.4 [9.31;18.3]          | 4.73 [2.23;7.59]               | 0.037   |
| GO:0019493 BP 05 arginine catabolic process to proline                 | 10.4 [9.31;18.3]          | 4.73 [2.23;7.59]               | 0.037   |
| GO:0070981 BP 07 L-asparagine biosynthetic process                     | 2979 [2327;3312]          | 1990 [1698;2398]               | 0.037   |
| GO:0070982 BP 06 L-asparagine metabolic process                        | 2979 [2327;3312]          | 1990 [1698;2398]               | 0.037   |
| <b>Lipid metabolism</b>                                                |                           |                                |         |
| GO:0006633 BP 05 fatty acid biosynthetic process                       | 20027 [17124;22373]       | 14712 [13021;15649]            | 0.016   |
| GO:0046488 BP 06 phosphatidylinositol metabolic process                | 971 [791;1018]            | 378 [177;570]                  | 0.016   |
| GO:0046834 BP 05 lipid phosphorylation                                 | 967 [789;1010]            | 386 [173;602]                  | 0.016   |
| GO:0046854 BP 06 phosphatidylinositol phosphorylation                  | 940 [783;995]             | 357 [158;542]                  | 0.016   |
| GO:0033542 BP 07 fatty acid beta-oxidation, unsaturated, even number   | 0.00 [0.00;0.00]          | 0.10 [0.05;0.13]               | 0.021   |
| GO:0097089 BP 05 methyl-branched fatty acid metabolic process          | 0.07 [0.01;0.30]          | 0.00 [0.00;0.00]               | 0.022   |
| GO:0006631 BP 04 fatty acid metabolic                                  | 24222                     | 18177 [17387;19902]            | 0.025   |

|                                                                  |                        |                        |       |
|------------------------------------------------------------------|------------------------|------------------------|-------|
| process                                                          | [20460;27343]          |                        |       |
| GO:0006655   BP   06   phosphatidylglycerol biosynthetic process | 2036 [1767;2293]       | 1358 [1181;1547]       | 0.025 |
| GO:0006665   BP   04   sphingolipid metabolic process            | 1035 [775;1483]        | 472 [438;706]          | 0.025 |
| GO:0008653   BP   04   lipopolysaccharide metabolic process      | 8867 [7912;10182]      | 6459 [5717;6717]       | 0.025 |
| GO:0009103   BP   05   lipopolysaccharide biosynthetic process   | 8867 [7912;10176]      | 6458 [5717;6717]       | 0.025 |
| GO:0030497   BP   06   fatty acid elongation                     | 1177 [1026;1230]       | 795 [692;897]          | 0.025 |
| GO:0032048   BP   07   cardiolipin metabolic process             | 1740 [1423;2016]       | 887 [644;1297]         | 0.025 |
| GO:0032049   BP   07   cardiolipin biosynthetic process          | 1740 [1422;2016]       | 886 [643;1297]         | 0.025 |
| GO:0046471   BP   06   phosphatidylglycerol metabolic process    | 2037 [1768;2294]       | 1360 [1183;1547]       | 0.025 |
| GO:0046360   BP   07   2-oxobutyrate biosynthetic process        | 0.00 [0.00;0.09]       | 0.26 [0.09;0.73]       | 0.034 |
| GO:0046361   BP   06   2-oxobutyrate metabolic process           | 0.00 [0.00;0.09]       | 0.26 [0.09;0.73]       | 0.034 |
| GO:0006642   BP   07   triglyceride mobilization                 | 1.24 [0.72;2.01]       | 3.41 [3.05;5.00]       | 0.037 |
| GO:0006700   BP   04   C21-steroid hormone biosynthetic process  | 0.30 [0.08;0.68]       | 0.00 [0.00;0.05]       | 0.046 |
| GO:0006701   BP   05   progesterone biosynthetic process         | 0.30 [0.08;0.68]       | 0.00 [0.00;0.05]       | 0.046 |
| GO:0016254   BP   06   preassembly of GPI anchor in ER membrane  | 0.00 [0.00;0.08]       | 0.11 [0.10;0.20]       | 0.05  |
| <b>Carbohydrate metabolism</b>                                   |                        |                        |       |
| GO:0005997   BP   06   xylulose metabolic process                | 712 [532;870]          | 232 [185;294]          | 0.004 |
| GO:0006014   BP   06   D-ribose metabolic process                | 1902 [1684;2273]       | 558 [495;623]          | 0.004 |
| GO:0019299   BP   06   rhamnose metabolic process                | 3385 [3229;3782]       | 1656 [1536;2471]       | 0.004 |
| GO:0019400   BP   03   alditol metabolic process                 | 5777 [5209;6120]       | 3252 [3030;3374]       | 0.004 |
| GO:0019852   BP   05   L-ascorbic acid metabolic process         | 636 [598;816]          | 310 [226;371]          | 0.004 |
| GO:0019854   BP   05   L-ascorbic acid catabolic process         | 609 [555;787]          | 259 [188;324]          | 0.004 |
| GO:0036065   BP   05   fucosylation                              | 301 [225;384]          | 95.6 [46.0;149]        | 0.004 |
| GO:0042836   BP   06   D-glucarate metabolic process             | 264 [154;434]          | 59.2 [50.4;74.6]       | 0.004 |
| GO:0042838   BP   07   D-glucarate catabolic process             | 264 [154;434]          | 59.2 [50.4;74.6]       | 0.004 |
| GO:0005975   BP   03   carbohydrate metabolic process            | 215916 [200986;244914] | 125668 [116396;144120] | 0.006 |
| GO:0010412   BP   05   mannan metabolic process                  | 683 [657;846]          | 108 [69.3;210]         | 0.006 |

|                                                                 |                        |                     |       |
|-----------------------------------------------------------------|------------------------|---------------------|-------|
| GO:0019303 BP 07 D-ribose catabolic process                     | 796 [605;912]          | 158 [136;196]       | 0.006 |
| GO:0019321 BP 05 pentose metabolic process                      | 7844 [6849;9257]       | 3209 [2917;4367]    | 0.006 |
| GO:0019520 BP 04 aldonic acid metabolic process                 | 790 [574;1029]         | 355 [228;391]       | 0.006 |
| GO:0019521 BP 05 D-gluconate metabolic process                  | 739 [547;892]          | 315 [181;335]       | 0.006 |
| GO:0019577 BP 04 aldaric acid metabolic process                 | 585 [350;820]          | 167 [128;213]       | 0.006 |
| GO:0019579 BP 05 aldaric acid catabolic process                 | 585 [350;820]          | 167 [128;213]       | 0.006 |
| GO:0046355 BP 05 mannan catabolic process                       | 683 [657;846]          | 107 [68.8;210]      | 0.006 |
| GO:0046365 BP 05 monosaccharide catabolic process               | 23393 [22201;30463]    | 17458 [16743;19317] | 0.006 |
| GO:0006004 BP 06 fucose metabolic process                       | 4780 [4213;5059]       | 1981 [1859;2328]    | 0.01  |
| GO:0006063 BP 05 uronic acid metabolic process                  | 3772 [3014;4308]       | 2173 [1678;2486]    | 0.01  |
| GO:0006080 BP 05 substituted mannan metabolic process           | 455 [302;667]          | 103 [72.9;137]      | 0.01  |
| GO:0019323 BP 06 pentose catabolic process                      | 2246 [2169;2605]       | 1201 [939;1586]     | 0.01  |
| GO:0019698 BP 07 D-galacturonate catabolic process              | 552 [426;731]          | 247 [152;273]       | 0.01  |
| GO:0042120 BP 04 alginic acid metabolic process                 | 1227 [982;1465]        | 401 [332;530]       | 0.01  |
| GO:0042121 BP 05 alginic acid biosynthetic process              | 1227 [982;1465]        | 401 [332;530]       | 0.01  |
| GO:0042353 BP 07 fucose biosynthetic process                    | 160 [134;164]          | 110 [102;122]       | 0.01  |
| GO:0044247 BP 05 cellular polysaccharide catabolic process      | 3919 [3706;4001]       | 2231 [2037;2654]    | 0.01  |
| GO:0044275 BP 04 cellular carbohydrate catabolic process        | 8042 [7524;8323]       | 5019 [4694;5617]    | 0.01  |
| GO:0046396 BP 07 D-galacturonate metabolic process              | 552 [426;731]          | 247 [152;273]       | 0.01  |
| GO:0046835 BP 04 carbohydrate phosphorylation                   | 11591 [10484;13607]    | 6794 [6614;8088]    | 0.01  |
| GO:0005996 BP 04 monosaccharide metabolic process               | 53533 [48054;63494]    | 39243 [37801;41579] | 0.016 |
| GO:0006098 BP 05 pentose-phosphate shunt                        | 10598 [9186;12580]     | 8290 [7823;8789]    | 0.016 |
| GO:0044262 BP 03 cellular carbohydrate metabolic process        | 54658 [47114;61738]    | 37217 [36561;37919] | 0.016 |
| GO:0044723 BP 03 single-organism carbohydrate metabolic process | 119183 [105710;137532] | 87237 [84133;91911] | 0.016 |
| GO:0052695 BP 07 cellular glucuronidation                       | 0.17 [0.04;0.47]       | 2.74 [1.53;5.10]    | 0.016 |
| GO:0000271 BP 05 polysaccharide                                 | 24695                  | 18456 [17666;18686] | 0.025 |



|                                                                              |                     |                     |       |
|------------------------------------------------------------------------------|---------------------|---------------------|-------|
| biosynthetic process                                                         | [22721;27868]       |                     |       |
| GO:0005983   BP   06   starch catabolic process                              | 1441 [1156;1985]    | 531 [393;791]       | 0.025 |
| GO:0005991   BP   04   trehalose metabolic process                           | 779 [679;1062]      | 181 [103;270]       | 0.025 |
| GO:0006039   BP   05   cell wall chitin catabolic process                    | 0.13 [0.01;0.21]    | 0.52 [0.43;0.72]    | 0.025 |
| GO:0008653   BP   04   lipopolysaccharide metabolic process                  | 8867 [7912;10182]   | 6459 [5717;6717]    | 0.025 |
| GO:0009103   BP   05   lipopolysaccharide biosynthetic process               | 8867 [7912;10176]   | 6458 [5717;6717]    | 0.025 |
| GO:0009243   BP   05   O antigen biosynthetic process                        | 3064 [2966;3659]    | 2183 [1823;2571]    | 0.025 |
| GO:0010325   BP   06   raffinose family oligosaccharide biosynthetic process | 1.99 [1.83;3.56]    | 0.16 [0.04;0.50]    | 0.025 |
| GO:0016052   BP   04   carbohydrate catabolic process                        | 65922 [59571;79747] | 49179 [46830;53605] | 0.025 |
| GO:0019317   BP   07   fucose catabolic process                              | 2072 [1526;2471]    | 1266 [980;1498]     | 0.025 |
| GO:0033531   BP   05   stachyose metabolic process                           | 1.99 [1.83;3.56]    | 0.16 [0.04;0.50]    | 0.025 |
| GO:0033532   BP   06   stachyose biosynthetic process                        | 1.99 [1.83;3.56]    | 0.16 [0.04;0.50]    | 0.025 |
| GO:0034218   BP   03   ascospore wall chitin metabolic process               | 0.13 [0.01;0.21]    | 0.52 [0.43;0.72]    | 0.025 |
| GO:0034232   BP   04   ascospore wall chitin catabolic process               | 0.13 [0.01;0.21]    | 0.52 [0.43;0.72]    | 0.025 |
| GO:0044264   BP   04   cellular polysaccharide metabolic process             | 28233 [24833;32382] | 21041 [20388;22244] | 0.025 |
| GO:0046402   BP   05   O antigen metabolic process                           | 3064 [2966;3659]    | 2183 [1823;2571]    | 0.025 |
| GO:0005976   BP   04   polysaccharide metabolic process                      | 40290 [35993;42926] | 26028 [24823;27706] | 0.037 |
| GO:0005992   BP   05   trehalose biosynthetic process                        | 241 [189;318]       | 42.1 [11.1;122]     | 0.037 |
| GO:0005993   BP   05   trehalose catabolic process                           | 128 [78.7;216]      | 42.7 [31.7;53.8]    | 0.037 |
| GO:0006013   BP   06   mannose metabolic process                             | 936 [822;1048]      | 235 [204;499]       | 0.037 |
| GO:0009052   BP   06   pentose-phosphate shunt, non-oxidative branch         | 484 [419;727]       | 196 [117;266]       | 0.037 |
| GO:0019301   BP   07   rhamnose catabolic process                            | 2488 [2271;2604]    | 1172 [1106;1672]    | 0.037 |
| GO:0019318   BP   05   hexose metabolic process                              | 42911 [36535;47970] | 32856 [31920;35423] | 0.037 |
| GO:0019320   BP   06   hexose catabolic process                              | 17978 [15369;20906] | 13990 [12888;15708] | 0.037 |
| GO:0033692   BP   04   cellular polysaccharide biosynthetic process          | 19495 [18011;24220] | 17052 [15244;17525] | 0.037 |
| GO:0034637   BP   03   cellular carbohydrate                                 | 20353               | 17275 [15886;17766] | 0.037 |

|                                                                    |                     |                     |       |
|--------------------------------------------------------------------|---------------------|---------------------|-------|
| biosynthetic process                                               | [18572;24783]       |                     |       |
| GO:0042839 BP 07 D-glucuronate metabolic process                   | 56.3 [50.8;77.0]    | 32.1 [25.7;36.3]    | 0.037 |
| GO:0042840 BP 07 D-glucuronate catabolic process                   | 56.3 [50.8;77.0]    | 32.1 [25.7;36.3]    | 0.037 |
| GO:0044724 BP 04 single-organism carbohydrate catabolic process    | 55615 [49087;65395] | 41727 [40412;46686] | 0.037 |
| GO:0045226 BP 05 extracellular polysaccharide biosynthetic process | 6204 [5325;6587]    | 3832 [3384;4179]    | 0.037 |
| GO:0045488 BP 06 pectin metabolic process                          | 1642 [1583;1690]    | 859 [690;1438]      | 0.037 |
| GO:0045490 BP 06 pectin catabolic process                          | 1603 [1489;1665]    | 741 [620;1348]      | 0.037 |
| GO:0046351 BP 04 disaccharide biosynthetic process                 | 266 [210;332]       | 48.6 [14.2;129]     | 0.037 |
| GO:0046379 BP 05 extracellular polysaccharide metabolic process    | 6211 [5330;6594]    | 3842 [3398;4188]    | 0.037 |
| GO:0005989 BP 05 lactose biosynthetic process                      | 6.34 [1.90;25.7]    | 0.02 [0.00;1.13]    | 0.042 |
| <b>Xenobiotic degradation</b>                                      |                     |                     |       |
| GO:0006805 BP 03 xenobiotic metabolic process                      | 1592 [1162;1868]    | 834 [517;940]       | 0.01  |
| GO:0042178 BP 04 xenobiotic catabolic process                      | 1117 [786;1588]     | 448 [261;638]       | 0.01  |
| GO:0010124 BP 05 phenylacetate catabolic process                   | 790 [617;1408]      | 263 [157;328]       | 0.016 |
| GO:0019380 BP 05 3-phenylpropionate catabolic process              | 30.8 [13.0;48.8]    | 4.99 [3.47;8.36]    | 0.025 |

**Supplementary Table S3:** Statistical analysis on gene family abundances involved in amino acid, lipid, carbohydrate and xenobiotic metabolic processes using Kruskal Wallis statistical test where significance was accepted as a corrected p value of <0.05.

| Metabolite                              | CF group median     | Control group median | p value |
|-----------------------------------------|---------------------|----------------------|---------|
| X147                                    | -0.05 [-0.06;-0.02] | 0.49 [0.22;1.14]     | 0.004   |
| Pentanedioic acid, 3-hydroxy-3-methyl-  | 1.23 [0.84;1.69]    | 0.60 [0.57;0.62]     | 0.006   |
| Ornithine                               | 0.13 [0.11;0.32]    | 0.04 [0.03;0.04]     | 0.006   |
| Tryptophan                              | 0.05 [0.04;0.06]    | 0.03 [0.02;0.03]     | 0.006   |
| Dimethyl phthalate                      | 1.23 [0.66;2.62]    | 0.01 [0.01;0.01]     | 0.006   |
| X96                                     | 0.98 [0.12;2.40]    | 0.03 [0.02;0.05]     | 0.01    |
| X151                                    | 1.27 [1.18;1.38]    | 0.87 [0.82;1.03]     | 0.01    |
| Benzenepropanoic acid, 3,4-dimethoxy-   | 1.43 [0.76;1.70]    | 0.40 [0.30;0.48]     | 0.016   |
| 2-Piperidinone                          | 1.38 [0.84;2.46]    | 0.11 [0.09;0.49]     | 0.025   |
| 1,4-Benzenedicarboxylic acid, 2-amino-, | 0.66 [0.59;0.76]    | 0.52 [0.49;0.58]     | 0.025   |
| 9-Octadecenoic acid                     | 1.56 [0.86;1.65]    | 0.41 [0.32;0.45]     | 0.025   |
| Glutamine                               | 0.54 [0.28;1.80]    | 0.17 [0.12;0.23]     | 0.037   |
| Myristic acid                           | 1.37 [1.20;1.59]    | 1.03 [0.87;1.07]     | 0.037   |
| Hexadecanoic acid                       | 1.53 [1.28;1.77]    | 0.78 [0.76;0.81]     | 0.037   |
| Lysine                                  | 0.50 [0.38;0.68]    | 0.21 [0.18;0.36]     | 0.037   |
| Citric acid                             | 0.07 [0.06;0.11]    | 0.05 [0.04;0.06]     | 0.037   |

**Supplementary Table S4:** Significant differences in the metabolites present in the CF and control groups based on the GC-MS data.

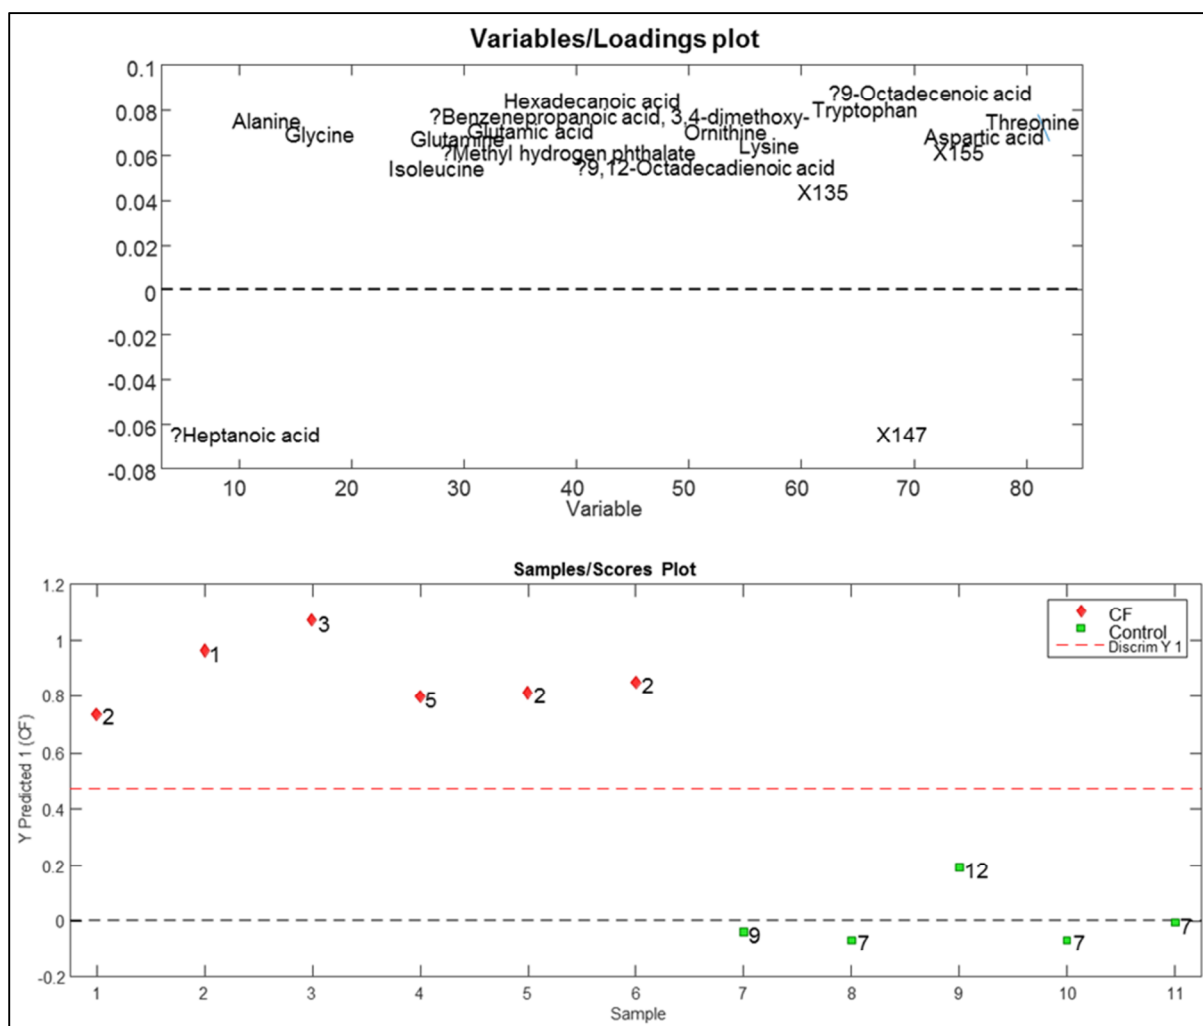

**Supplementary Figure S1:** Upper plot: regression vector from the PLS-DA model. Lower plot: results from prediction of test-set samples (samples not included in the creation of the model). Upper plot shows metabolites higher in the CF samples when above the 0, and those lower in the CF samples compared to the controls below 0. The lower plot shows correct prediction of whether samples are CF or controls based on PLS-DA model.

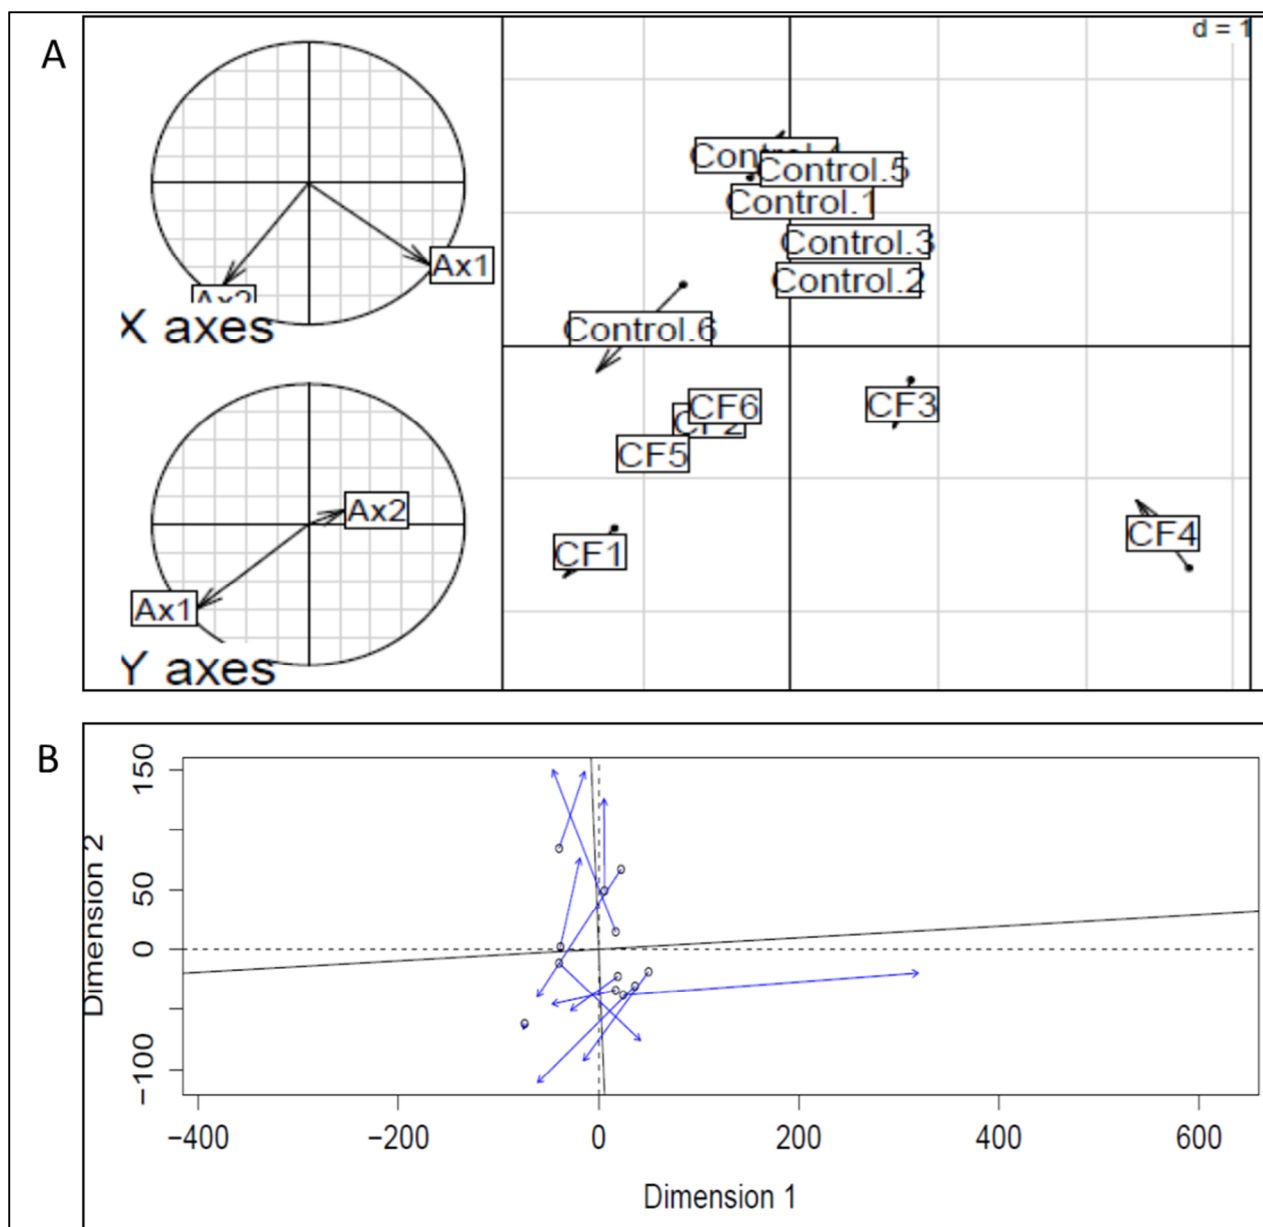

**Supplementary Figure S2:** Co-inertia (A) and Procrustes analysis (B) both depicted a strong positive correlation ( $r^2=0.81$ ) between the metabolites and the pathway abundances
